# Supplementary material for: Human Milk Oligosaccharide-Stimulated Bifidobacterium Species Contribute to Prevent Later Respiratory Tract Infections
Source: MDPI journal article supplement (doi:10.3390/microorganisms9091939), 2021-09-12
Supplement: s1 [file s1]

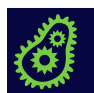

## Article

# Human Milk Oligosaccharide-Stimulated *Bifidobacterium* Species Contribute to Prevent Later Respiratory Tract Infections

Shaillay Kumar Dogra, Francois-Pierre Martin, Dominique Donnicola, Monique Julita <sup>†</sup>, Bernard Berger and Norbert Sprenger <sup>\*</sup>

Nestlé Institute of Health Sciences, Société des Produits Nestlé S.A., 1000 Lausanne 26, Switzerland; ShaillayKumar.Dogra@rd.nestle.com (S.K.D.); Francois-Pierre.Martin@rd.nestle.com (F.-P.M.); dominique.donnicola@rdls.nestle.com (D.D.); bernard.berger@rdls.nestle.com (B.B.)

<sup>\*</sup> Correspondence: Norbert.sprenger@rdls.nestle.com; Tel.: +41-21-7858-532

<sup>†</sup> Retired.

**Table S1.** Loadings of 5 independent rounds of sPLSDA modeling to separate controls and cases for bronchitis ( $n = 52$ ) and LRTI.

| Bronchitis case-control  |  |           |          |          |           |           |      |         |      |         |      |      |
|--------------------------|--|-----------|----------|----------|-----------|-----------|------|---------|------|---------|------|------|
| Component 1              |  | round 1   |          | round 2  |           | round 3   |      | round 4 |      | round 5 |      | mean |
| Feature                  |  | value     | rank     | value    | rank      | value     | rank | value   | rank | value   | rank | rank |
| % Acetate                |  | -0.453    | 2        | -0.506   | 1         |           |      | -0.516  | 1    | -0.456  | 2    | 1.5  |
| Product                  |  | -0.314    | 4        | -0.449   | 3         |           |      | -0.381  | 2    | -0.463  | 1    | 2.8  |
| Lactobacillus            |  |           |          |          |           | 0.392     | 3    |         |      |         |      | 3.0  |
| Bifidobacterium          |  |           |          |          |           |           |      | -0.307  | 4    |         |      | 4.0  |
| % Valerate               |  |           |          |          |           |           |      |         |      | 0.381   | 4    | 4.0  |
| Fucosyl-Glycans          |  | -0.266    | 6        | -0.388   | 4         | -0.616    | 1    | -0.290  | 5    | -0.155  | 8    | 4.8  |
| Succinate                |  | 0.456     | 1        | 0.178    | 6         | 0.442     | 2    | 0.240   | 7    | 0.138   | 9    | 5.0  |
| % Butyrate               |  | 0.320     | 3        | 0.057    | 10        | 0.250     | 5    | 0.227   | 8    | 0.388   | 3    | 5.8  |
| % Propionate             |  | 0.134     | 12       | 0.489    | 2         |           |      | 0.281   | 6    |         |      | 6.7  |
| Enterococcus             |  | -0.242    | 7        |          |           |           |      |         |      |         |      | 7.0  |
| % 5-Aminovalerate        |  | 0.307     | 5        | 0.045    | 11        | 0.232     | 6    | 0.217   | 9    | 0.370   | 5    | 7.2  |
| Tyrosine                 |  | 0.146     | 11       | 0.266    | 5         |           |      |         |      |         |      | 8.0  |
| Isoleucine               |  |           |          | 0.114    | 8         |           |      |         |      |         |      | 8.0  |
| Trabulsella              |  |           |          |          |           |           |      | 0.119   | 10   | 0.268   | 6    | 8.0  |
| AAT                      |  | -0.179    | 9        | -0.158   | 7         | -0.171    | 7    |         |      | -0.070  | 10   | 8.3  |
| Calprotectin             |  | 0.004     | 16       |          |           | 0.138     | 8    | 0.378   | 3    |         |      | 9.0  |
| Phenylalanine            |  |           |          | 0.074    | 9         |           |      |         |      |         |      | 9.0  |
| Escherichia              |  | 0.238     | 8        | 0.033    | 12        | 0.025     | 9    |         |      |         |      | 9.7  |
| Elastase                 |  | -0.156    | 10       |          |           |           |      |         |      |         |      | 10.0 |
| Enterobacteriaceae_Other |  |           |          |          |           | -0.020    | 10   |         |      |         |      | 10.0 |
| Mode of delivery         |  |           |          |          |           |           |      | 0.009   | 13   | 0.160   | 7    | 10.0 |
| Lactate                  |  |           |          | -0.003   | 13        |           |      | -0.099  | 11   |         |      | 12.0 |
| Carnobacteriaceae_Other  |  |           |          |          |           |           |      | 0.088   | 12   |         |      | 12.0 |
| Neopterin                |  | -0.075    | 13       |          |           |           |      |         |      |         |      | 13.0 |
| Ruminococcus             |  | 0.046     | 14       |          |           |           |      |         |      |         |      | 14.0 |
| Streptococcus            |  | -0.041    | 15       |          |           |           |      |         |      |         |      | 15.0 |
| LRTI case-control        |  |           |          |          |           |           |      |         |      |         |      |      |
| Component 1              |  | round 1   |          | round 2  |           | round 3   |      | round 4 |      | round 5 |      | mean |
| Feature                  |  | value     | rank     | value    | rank      | value     | rank | value   | rank | value   | rank | rank |
| Product                  |  | -0.463    | 2        | -0.404   | 3         | -0.555    | 1    | -0.477  | 1    | -0.375  | 2    | 1.8  |
| % Acetate                |  | -0.537    | 1        | -0.468   | 2         | -0.540    | 2    | -0.351  | 3    | -0.372  | 3    | 2.2  |
| Fucosyl-glycans          |  | -0.399    | 3        | -0.218   | 5         | -0.425    | 3    | -0.444  | 2    | -0.281  | 5    | 3.6  |
| % Propionate             |  | 0.342     | 4        | 0.351    | 4         | 0.307     | 4    | 0.272   | 5    | 0.430   | 1    | 3.6  |
| AAT                      |  |           |          | -0.106   | 7         |           |      |         |      |         |      | 7.0  |
| Succinate                |  | 0.236     | 6        | 0.638    | 1         | 0.051     | 9    | 0.247   | 6    | 0.091   | 14   | 7.2  |
| % Butyrate               |  | 0.240     | 5        | 0.013    | 10        | 0.215     | 5    | 0.184   | 9    |         |      | 7.3  |
| Actinomyces              |  |           |          |          |           | 0.089     | 8    | 0.187   | 8    | 0.261   | 6    | 7.3  |
| % 5-Aminovalerate        |  | 0.220     | 7        |          |           | 0.198     | 6    | 0.176   | 10   |         |      | 7.7  |
| Carnobacteriaceae_Other  |  | 0.037     | 12       |          |           |           |      | 0.282   | 4    |         |      | 8.0  |
| Enterobacteriaceae_Other |  |           |          |          |           |           |      |         |      | 0.217   | 8    | 8.0  |
| Escherichia              |  | 0.137     | 9        | 0.105    | 8         |           |      | 0.164   | 12   | 0.231   | 7    | 9.0  |
| Isoleucine               |  |           |          |          |           |           |      |         |      | 0.213   | 9    | 9.0  |
| Bifidobacterium          |  | -0.189    | 8        |          |           |           |      | -0.209  | 7    | -0.155  | 13   | 9.3  |
| Trabulsella              |  | 0.045     | 10       |          |           | 0.172     | 7    | 0.172   | 11   | 0.202   | 10   | 9.5  |
| Enterococcus             |  |           |          | -0.128   | 6         |           |      | -0.121  | 13   |         |      | 9.5  |
| % Valerate               |  |           |          | 0.043    | 9         | 0.011     | 10   |         |      |         |      | 9.5  |
| Tyrosine                 |  |           |          |          |           |           |      | 0.054   | 16   | 0.317   | 4    | 10.0 |
| Phenylalanine            |  |           |          |          |           |           |      |         |      | 0.197   | 11   | 11.0 |
| Ruminococcus             |  |           |          |          |           |           |      |         |      | 0.175   | 12   | 12.0 |
| Tyrosine                 |  | 0.032     | 13       |          |           |           |      |         |      |         |      | 13.0 |
| Veillonella              |  |           |          |          |           |           |      | -0.093  | 14   |         |      | 14.0 |
| Calprotectin             |  | 0.038     | 11       |          |           |           |      | 0.039   | 18   |         |      | 14.5 |
| Mode of Delivery         |  |           |          |          |           |           |      | 0.087   | 15   |         |      | 15.0 |
| Streptococcaceae_Other   |  |           |          |          |           |           |      |         |      | 0.002   | 15   | 15.0 |
| Lactate                  |  |           |          |          |           |           |      | -0.044  | 17   |         |      | 17.0 |
| AUC-ROC comp 1           |  |           |          |          |           |           |      |         |      |         |      |      |
| p-value                  |  | 0.78      | 0.76     | 0.82     | 0.80      | 0.74      |      |         |      |         |      |      |
| p-value                  |  | 0.0005423 | 0.001198 | 6.62E-05 | 0.0002183 | 0.003409  |      |         |      |         |      |      |
| Component 2              |  |           |          |          |           |           |      |         |      |         |      |      |
| Component 2              |  | round 1   |          | round 2  |           | round 3   |      | round 4 |      | round 5 |      | mean |
| Feature                  |  | value     | rank     | value    | rank      | value     | rank | value   | rank | value   | rank | rank |
| Elastase                 |  | -0.949    | 1        |          |           | -0.966    | 1    | -0.911  | 1    |         |      | 1    |
| Lipocalin                |  |           |          |          |           |           |      |         |      | 0.8797  | 1    | 1    |
| Bifidobacterium          |  |           |          |          |           |           |      |         |      |         |      | 1    |
| Veillonella              |  |           |          | -0.861   | 1         |           |      | -0.409  | 2    |         |      | 2    |
| Neopterin                |  | -0.23     | 2        |          |           |           |      |         |      |         |      | 2    |
| Enterobacteriaceae_Other |  |           |          |          |           | -0.241    | 2    |         |      | -0.338  | 2    | 2    |
| AAT                      |  | -0.216    | 3        | -0.435   | 2         | -0.092    | 3    |         |      |         |      | 3    |
| total scfa               |  |           |          | -0.263   | 3         |           |      |         |      |         |      | 3    |
| Calprotectin             |  |           |          |          |           |           |      | 0.061   | 3    |         |      | 3    |
| Lactate                  |  |           |          |          |           |           |      |         |      | 0.3339  | 3    | 3    |
| AUC-ROC comp 1+2         |  |           |          |          |           |           |      |         |      |         |      |      |
| p-value                  |  | 0.87      | 0.82     | 0.85     | 0.89      | 0.81      |      |         |      |         |      |      |
| p-value                  |  | 6.17E-06  | 7.15E-05 | 1.57E-05 | 1.63E-06  | 0.0001127 |      |         |      |         |      |      |
| Component 2              |  |           |          |          |           |           |      |         |      |         |      |      |
| Component 2              |  | round 1   |          | round 2  |           | round 3   |      | round 4 |      | round 5 |      | mean |
| Feature                  |  | value     | rank     | value    | rank      | value     | rank | value   | rank | value   | rank | rank |
| Neopterin                |  |           |          | -0.695   | 1         |           |      |         |      |         |      | 1    |
| Veillonella              |  |           |          |          |           | -0.968    | 1    | -0.766  | 1    | -0.722  | 1    | 1    |
| Lactate                  |  | 0.9432    | 1        |          |           |           |      |         |      | 0.6775  | 2    | 2    |
| Streptococcus            |  | 0.3204    | 2        |          |           |           |      |         |      |         |      | 2    |
| Lactate                  |  |           |          | 0.6792   | 2         |           |      |         |      |         |      | 2    |
| Phenylalanine            |  |           |          | -0.236   | 3         | -0.226    | 2    | -0.462  | 2    |         |      | 2    |
| AlphaAT                  |  | -0.088    | 3        |          |           |           |      |         |      |         |      | 3    |
| % Valerate               |  |           |          |          |           |           |      |         |      | 0.1418  | 3    | 3    |
| Calprotectin             |  |           |          |          |           |           |      | 0.113   | 4    |         |      | 4    |
| Streptococcaceae_Other   |  |           |          |          |           |           |      | -0.005  | 5    |         |      | 5    |
| Bifidobacterium          |  |           |          |          |           | 0.1114    | 3    |         |      |         |      | 3    |
| Enterococcus             |  |           |          |          |           |           |      | -0.432  | 3    |         |      | 3    |
| AUC-ROC comp 1+2         |  |           |          |          |           |           |      |         |      |         |      |      |
| p-value                  |  | 0.84      | 0.87     | 0.76     | 0.81      | 0.76      |      |         |      |         |      |      |
| p-value                  |  | 2.02E-06  | 3.21E-07 | 3.38E-04 | 1.26E-05  | 0.0002508 |      |         |      |         |      |      |

direction of cases direction of controls

**Bronchitis cases vs controls**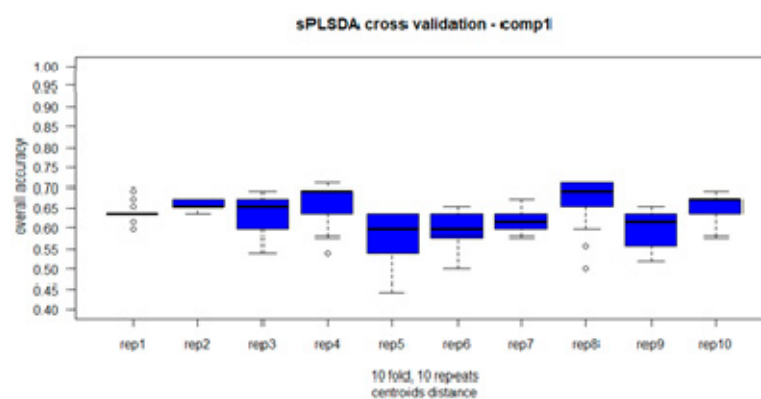**LRTI cases vs controls**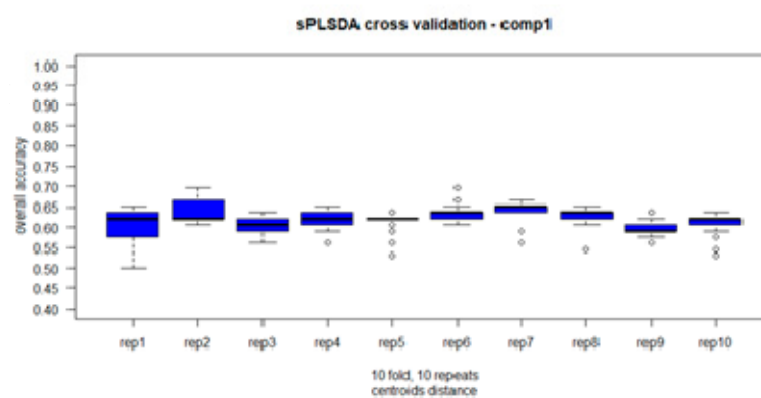

**Figure S1.** Representative sPLS-DA model accuracy to separate cases from controls.
